# Supplementary material for: Exploring Host Genetic Polymorphisms Involved in SARS-CoV Infection Outcomes: Implications for Personalized Medicine in COVID-19
Source: Int J Genomics. 2020 Oct 19;2020:6901217. doi: 10.1155/2020/6901217 (PMC7582067; doi:10.1155/2020/6901217)
Supplement: Supplementary Materials — Supplementary Table 1. PICO criteria used for the inclusion and exclusion of screened studies. Supplementary Table 2. Quality assessment of the individual studies by applying the AXIS tool. [file 6901217.f1.zip]

Archive with 2 entries (2 files):
- Supplementary Table 1_IJG_2020 (1).docx
- Supplementary Table 2_IJG_2020 (1).docx
